# Supplementary material for: Post-imprinting modification: electrochemical and scanning electrochemical microscopy studies of a semi-covalently surface imprinted polymer
Source: Royal Society of Chemistry journal article supplement (doi:10.1039/d2tb02116a), 2023-01-01
Supplement: d2tb02116a1.pdf [file d2tb02116a1.pdf]

Supporting Information

**Post-imprinting Modification: Electrochemical and Scanning Electrochemical  
Microscopy Studies of Semi-Covalently Surface Imprinted Polymer**

Jakub Kalecki<sup>a</sup>, Maciej Cieplak<sup>a</sup>, Zofia Iskierko<sup>a</sup>, Joanna Piechowska<sup>a</sup>, Wojciech Nogala<sup>a</sup>,  
Francis D'Souza<sup>b</sup>, Piyush Sindhu Sharma<sup>a,\*</sup>

<sup>a</sup> *Institute of Physical Chemistry, Polish Academy of Sciences, Kasprzaka 44/52, 01-224 Warsaw,  
Poland*

<sup>b</sup> *Department of Chemistry, University of North Texas, 1155 Union Circle No. 305070, Denton,  
TX 76203-5017, United States*

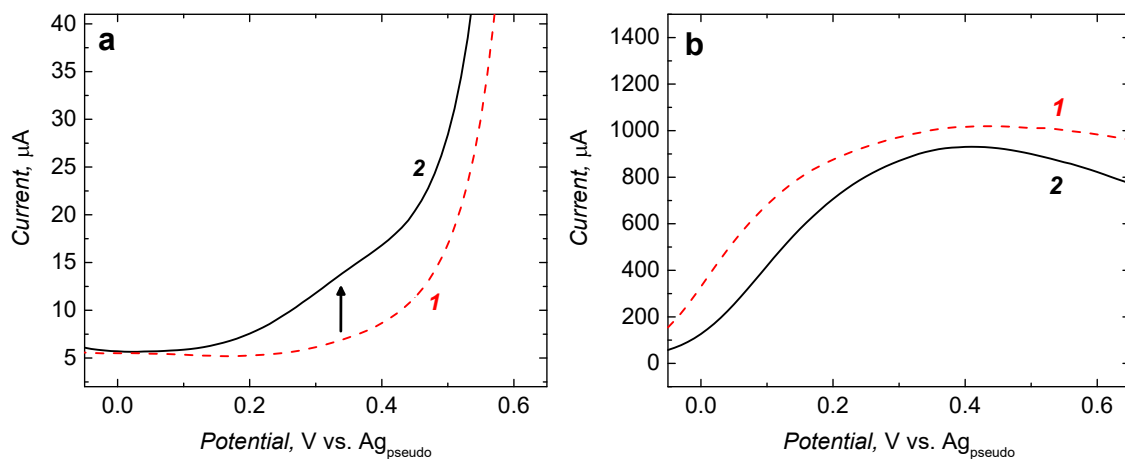

**Figure S1.** SWV measurement performed in 0.1 M  $\text{LiClO}_4/\text{ACN}$  for co-polymers of (a) 3,3'-bithiophene (**CR2**) and 2,2'-bithiophene-5-carbonyl chloride (**FM1**) and (b) 4H-cyclopenta[1,2-b:5,4-b']dithiophene (**CR4**) and 2,2'-bithiophene-5-carbonyl chloride (**FM1**) (1) before and (2) after covalently immobilized ferrocene modification. Measurement conditions include pulse height: 25 mV, pulse width: 50 ms, and step height: 10 mV.

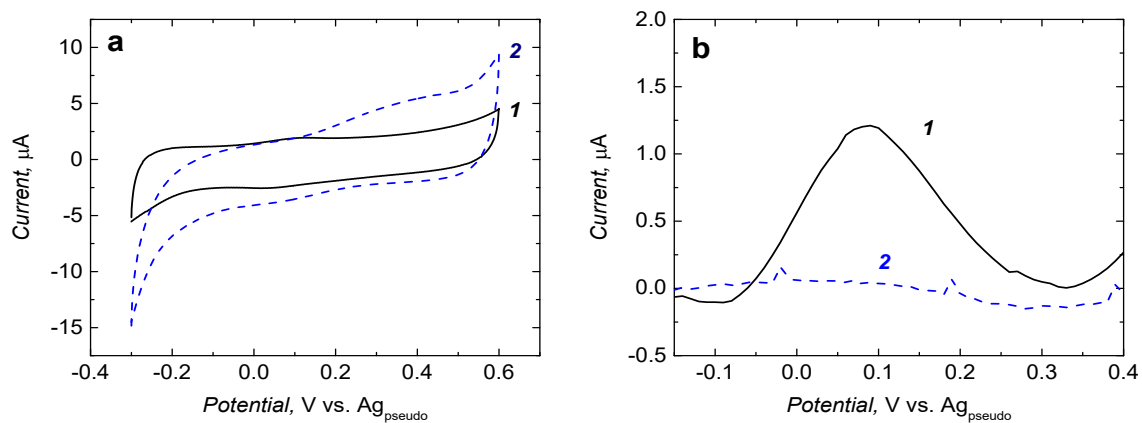

**Figure S2.** (a) Cyclic voltammetry and (b) square wave voltammetry measurements of BSA post-imprinted modified electrode. Semi-covalent surface imprinted polymers were prepared with (1) **FM2** and **CR2** (2) **FM1** and **CR3** combinations. Electrolyte: 0.5 mM H<sub>2</sub>SO<sub>4</sub>, CV: 50 mV/s, SWV: pulse height: 25 mV, pulse width: 50 ms, step height: 10 mV.

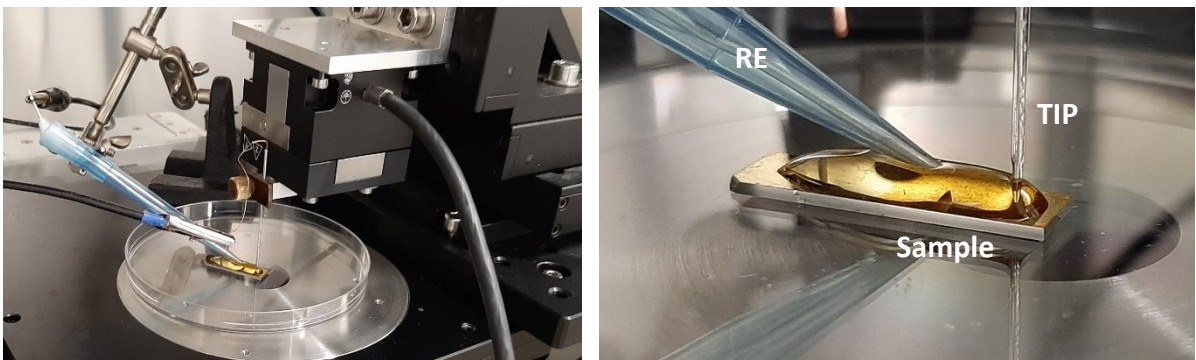

**Figure S3.** SECM measurement setup for polymer surface characterization. RE – Ag pseudo reference and counter electrode, TIP – platinum microelectrode (ca. 25  $\mu\text{m}$  diameter), Sample - post-imprinting polymer modified electrode or NIP polymer.

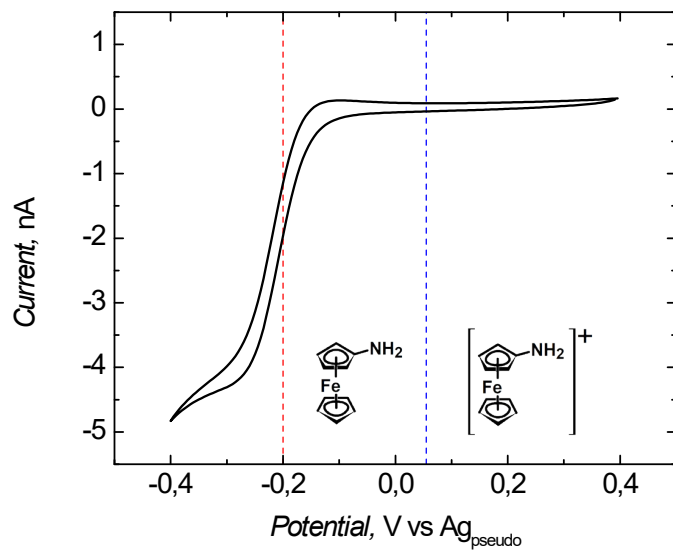

**Figure S4.** Voltammogram recorded on the SECM Pt probe tip in the bulk electrolyte, containing 1 mM Ru(NH<sub>3</sub>)<sub>6</sub>Cl<sub>3</sub> mediator in 0.1 M KCl. Redox potentials of Ru(NH<sub>3</sub>)<sub>6</sub><sup>3+</sup> (red dotted line) and aminoferrocene (blue dotted line) are marked. The potential scan rate was 50 mV/s.
